# Supplementary figures and images for: Self-organized reactivation maintains and reinforces memories despite synaptic turnover
Source: eLife journal article supplement (doi:10.7554/elife.43717), 2019-05-10

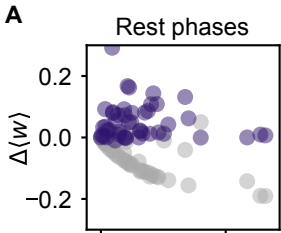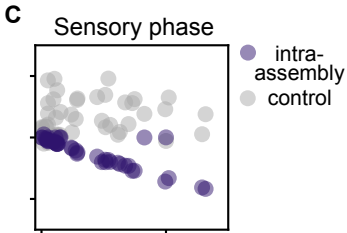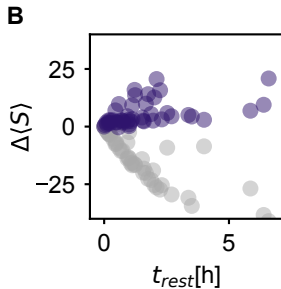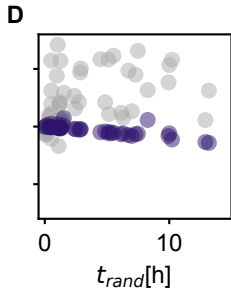

Supplement: supp [file elife_poa_e43717_Figure_4_figure_supplement_1.pdf › elife_poa_e43717_Figure_4_figure_supplement_1.pdf]

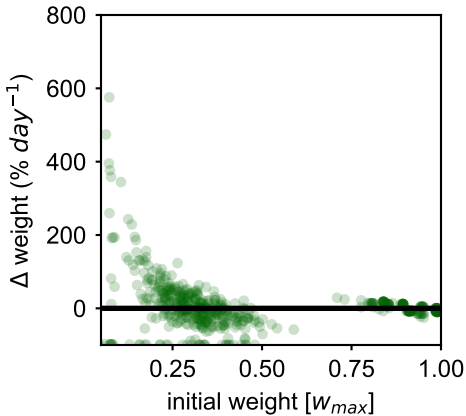

Supplement: supp [file elife_poa_e43717_Figure_4_figure_supplement_2.pdf › elife_poa_e43717_Figure_4_figure_supplement_2.pdf]
